# Supplementary material
Source: Springer Nature journal article supplement (https://www.springermedizin.de/resource/supplementary/12885_2009_1974_MOESM8_ESM.pdf/9460220)

**A** THL (%) 0 0.1 0.25 0.5

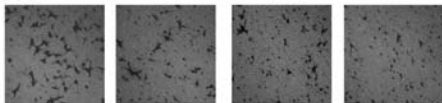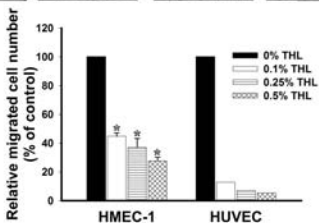

**B**

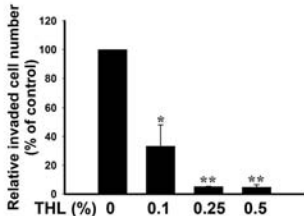

**C**

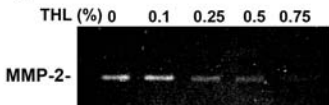

**D**

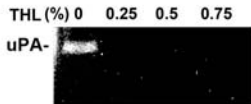

**E**

| VEGF    | - | + | +    | +    |
|---------|---|---|------|------|
| THL (%) | 0 | 0 | 0.25 | 0.75 |

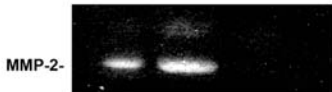

Supplement: MOESM8 [file 9460220]
